# Supplementary material for: High Numbers of CD163+ Tumor-Associated Macrophages Predict Poor Prognosis in HER2+ Breast Cancer
Source: MDPI journal article supplement (doi:10.3390/cancers16030634), 2024-02-01
Supplement: s1 [file s1]

**Supplementary Table S1.** The numbers of OS, BCSS and DFS events in the investigated breast cancer subgroups

|                  | Number<br>of<br>patients | OS<br>event*<br>n (%) | BCSS<br>event** n (%) | DFS event***<br>n (%) | Median follow-<br>up time<br>years (range) |
|------------------|--------------------------|-----------------------|-----------------------|-----------------------|--------------------------------------------|
| <b>All</b>       | 278                      | 98 (35)               | 68 (24)               | 91 (33)               | 13.1 (0.4-18.8)                            |
| CD163+ high      | 75                       | 41 (55)               | 33 (44)               | 37 (49)               |                                            |
| CD163+ low       | 201                      | 56 (28)               | 34 (17)               | 53 (26)               |                                            |
| CD68+ high       | 60                       | 26 (43)               | 22 (37)               | 27 (45)               |                                            |
| CD68+ low        | 210                      | 67 (32)               | 43 (20)               | 61 (29)               |                                            |
| <b>HER2+</b>     | 139                      | 55 (40)               | 43 (31)               | 53 (38)               | 12.7 (0.4-18.3)                            |
| CD163+ high      | 42                       | 27 (64)               | 24 (57)               | 26 (62)               |                                            |
| CD163+ low       | 96                       | 27 (28)               | 18 (19)               | 26 (27)               |                                            |
| CD68+ high       | 90                       | 41 (46)               | 32 (36)               | 36 (40)               |                                            |
| CD68+ low        | 46                       | 11 (24)               | 8 (17)                | 14 (30)               |                                            |
| <b>HER2+/HR+</b> | 82                       | 28 (34)               | 23 (28)               | 28 (34)               | 13.0 (0.4-18.3)                            |
| CD163+ high      | 31                       | 16 (52)               | 15 (48)               | 16 (52)               |                                            |
| CD163+ low       | 50                       | 11 (22)               | 7 (14)                | 11 (22)               |                                            |
| CD68+ high       | 47                       | 19 (40)               | 16 (34)               | 18 (38)               |                                            |
| CD68+ low        | 33                       | 7 (21)                | 5 (15)                | 8 (24)                |                                            |
| <b>HER2+/HR-</b> | 57                       | 27 (47)               | 20 (35)               | 25 (44)               | 11.6 (0.7-18.3)                            |
| CD163+ high      | 17                       | 13 (76)               | 11 (65)               | 12 (71)               |                                            |
| CD163+ low       | 40                       | 14 (35)               | 9 (23)                | 13 (33)               |                                            |
| CD68+ high       | 37                       | 19 (51)               | 15 (41)               | 17 (46)               |                                            |
| CD68+ low        | 19                       | 7 (37)                | 4 (21)                | 7 (37)                |                                            |
| <b>HER2-</b>     | 139                      | 43 (31)               | 25 (18)               | 38 (27)               | 13.5 (0.9-18.8)                            |
| CD163+ high      | 37                       | 16 (43)               | 10 (27)               | 13 (35)               |                                            |
| CD163+ low       | 101                      | 27 (27)               | 15 (15)               | 25 (25)               |                                            |
| CD68+ high       | 19                       | 8 (42)                | 7 (37)                | 10 (53)               |                                            |
| CD68+ low        | 115                      | 33 (29)               | 18 (16)               | 28 (24)               |                                            |
| <b>HER2-/HR+</b> | 121                      | 37 (31)               | 21 (17)               | 34 (28)               | 13.6 (2.1-18.8)                            |
| CD163+ high      | 27                       | 11 (41)               | 7 (26)                | 10 (37)               |                                            |
| CD163+ low       | 94                       | 26 (28)               | 14 (15)               | 24 (26)               |                                            |
| CD68+ high       | 42                       | 9 (21)                | 5 (12)                | 13 (31)               |                                            |
| CD68+ low        | 75                       | 26 (35)               | 16 (21)               | 21 (28)               |                                            |
| <b>HER2-/HR-</b> | 17                       | 6 (35)                | 4 (24)                | 4 (24)                | 12.9 (0.9-18.4)                            |
| CD163+ high      | 10                       | 5 (50)                | 3 (30)                | 3 (30)                |                                            |
| CD163+ low       | 7                        | 1 (14)                | 1 (14)                | 1 (14)                |                                            |
| CD68+ high       | 7                        | 3 (43)                | 3 (43)                | 3 (43)                |                                            |
| CD68+ low        | 10                       | 3 (30)                | 1 (10)                | 1 (10)                |                                            |

OS, overall survival; BCSS, breast cancer-specific survival; DFS disease-free survival; HR+, hormone receptor positive; HR-, hormone receptor negative

\*OS event=death; \*\*BCSS event=breast cancer death; \*\*\*DFS event=disease recurrence
